# Supplementary material
Source: publisher site journal article supplement (https://www.dovepress.com/article/325617)
Supplement: Supplementary file 1 [file get_supplementary_file.php]

**Case scenario about maternal and child nutritional service**

**Introduction:** Malnutrition is one of the major existing pandemic issues. Even if this problem affects global community, the significance is very high in developing countries. The burden of the problem is high at mothers and children. The problem on this segment of the population causes a devastating impact. Different evidences shows that the cause of this problem is mainly due to knowledge and awareness related problems related to proper nutrition practice. To solve this problem different strategies are designed by the Ethiopian government. Among these strategies one is nutrition package which is one of 17 packages of health extension program. This package is implemented by health extension workers.

**Benefits:** This Package has different benefits for the community. Among the benefits counseling about maternal nutrition service, infant and young child feeding practice, screening and referring of malnourished child to health facilities, supplementing of plum net for malnourished child and micronutrients for mothers. This project is given by the fund of government and other partners.

So, after presenting the case scenario, all participants were asked:

***Are you willing to pay some positive price for cataract surgery?***

***1*. *Yes***

***2*. *No***

Max=________________

YES

35 ETB

NO

YES

Max=________________

30 ETB

Max=____________________

NO

YES

25 ETB

NO

Max =____________________

YES

20 ETB

Max=_____________

NO

NO

15 ETB

Max=_____________

YES

Supplementary Figure 1 Iterative bidding technique used to elicit willingness to pay for nutrition package in Northwest Ethiopia. First bidding questions: If a maternal and child nutrition service session costs ETB 25, are you willing to pay that amount? Exchange rate: April 2017 US$ 1 = 23.4 ETB
